# Supplementary material
Source: PubMed Central journal article supplement (PMC7084088)
Supplement: pnas.1912146117.sapp.pdf [file pnas.1912146117.sapp.pdf]

## Supplementary Information for

### **A hepatocyte differentiation model reveals two subtypes of liver cancer with different oncofetal properties and therapeutic targets**

Ming Liu<sup>a,1,2</sup>, Qian Yan<sup>b,1</sup>, Yi Sun<sup>c,d,e,1</sup>, Yoonhee Nam<sup>f</sup>, Liang Hu<sup>c,d,e</sup>, Jane HC Loong<sup>k</sup>, Qi Ouyang<sup>c,d,e</sup>, Yu Zhang<sup>b</sup>, Hao-Long Li<sup>a</sup>, Fan-En Kong<sup>a</sup>, Lei Li<sup>b</sup>, Yan Li<sup>g</sup>, Mei-Mei Li<sup>a</sup>, Wei Cheng<sup>a</sup>, Ling-Xi Jiang<sup>h</sup>, Shuo Fang<sup>b</sup>, Xiao-Dong Yang<sup>b</sup>, Jia-Qiang Mo<sup>i</sup>, Yuan-Feng Gong<sup>a</sup>, Yun-Qiang Tang<sup>a</sup>, Yan Li<sup>j</sup>, Yun-Fei Yuan<sup>j</sup>, Ning-Fang Ma<sup>a</sup>, Ge Lin<sup>c,d,e</sup>, Stephanie Ma<sup>k</sup>, Ji-Guang Wang<sup>f</sup> and Xin-Yuan Guan<sup>a,b,j,2</sup>

Xin-Yuan Guan

Email: [xyguan@hku.hk](mailto:xyguan@hku.hk)

Ming Liu

Email: [liuming@gzhmu.edu.cn](mailto:liuming@gzhmu.edu.cn)

#### **This PDF file includes:**

Figs. S1 to S6

Tables S1 to S4

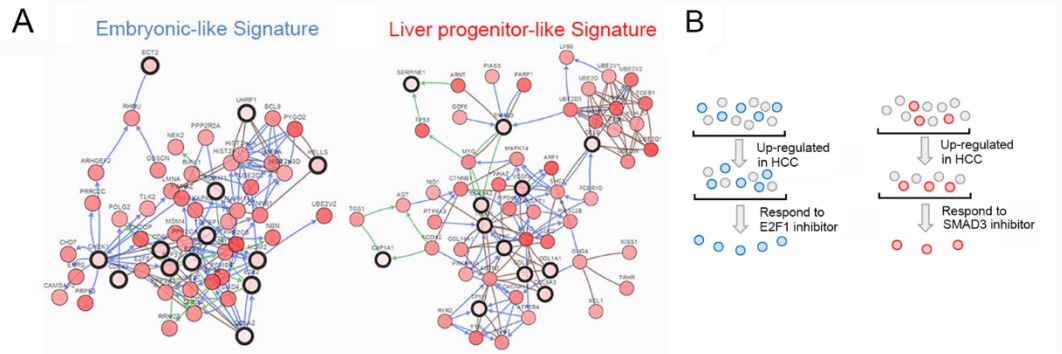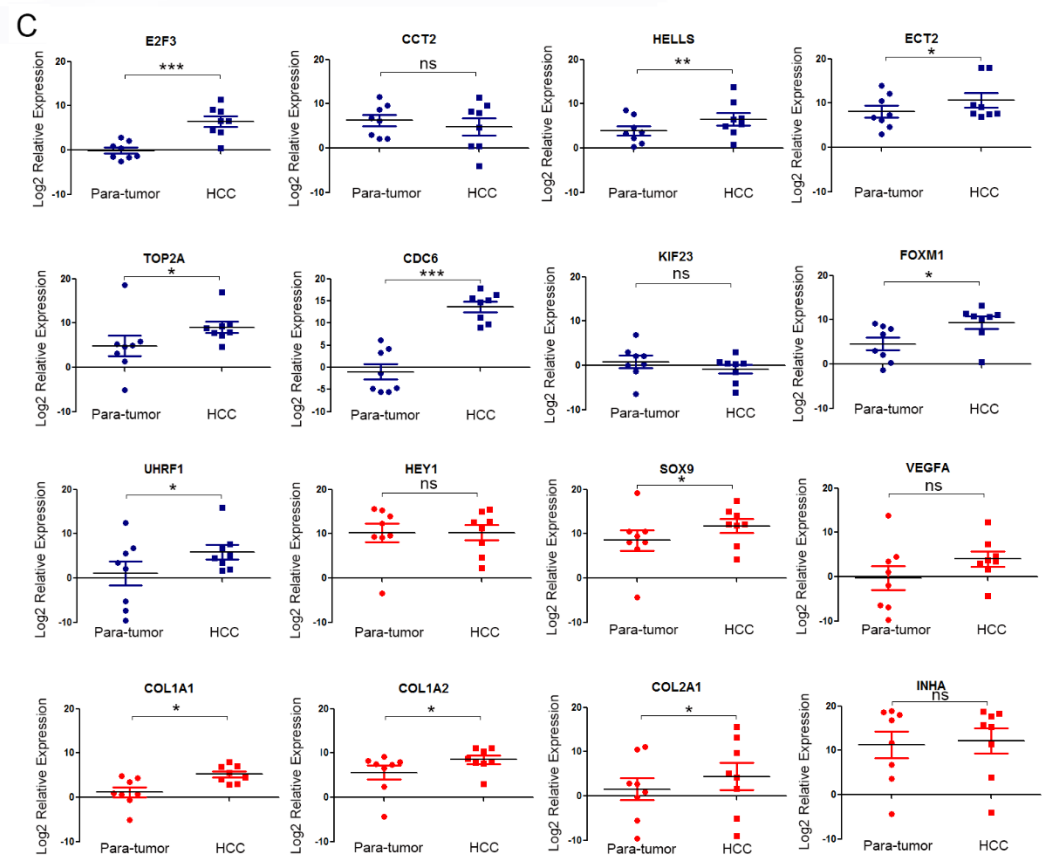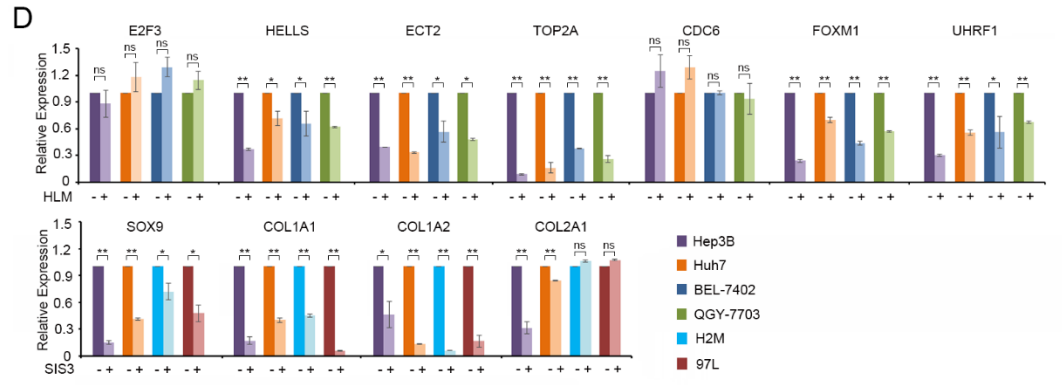

Liu et al. Appendix Fig. S1

**Fig. S1. Network analysis of core module genes with Embryonic-like signature and Liver progenitor-like signatures, and relative expression of candidate oncofetal genes in paired HCC clinical samples and cell lines.**

(A) The selected core module genes from the Embryonic-like subgroup or Liver progenitor-like subgroup were subjected for network analysis. The regulatory or interacting proteins were connected with arrow lines. The color represents the extent of upregulation in tumor tissues. (B) The top-ranked predicted targets which both up-regulated in HCC clinical samples and respond to small molecular inhibitors in HCC cell lines were selected as the core module genes of the two subtypes of liver cancer respectively. (C) The relative expression of ES-like signature genes and LP-like signature genes were screened in 8 paired HCC samples. Paired sample t test was used for statistical analysis. \*,  $P < 0.05$ , \*\*  $P < 0.01$ , \*\*\*,  $P < 0.001$ . (D) E2F1 inhibitor HLM6474 and SMAD3 inhibitor SIS3 were used to treat HCC cells with ES-like signature, LP-like signature or mixed signature. The relative expressions of candidate core module genes were detected by qPCR.

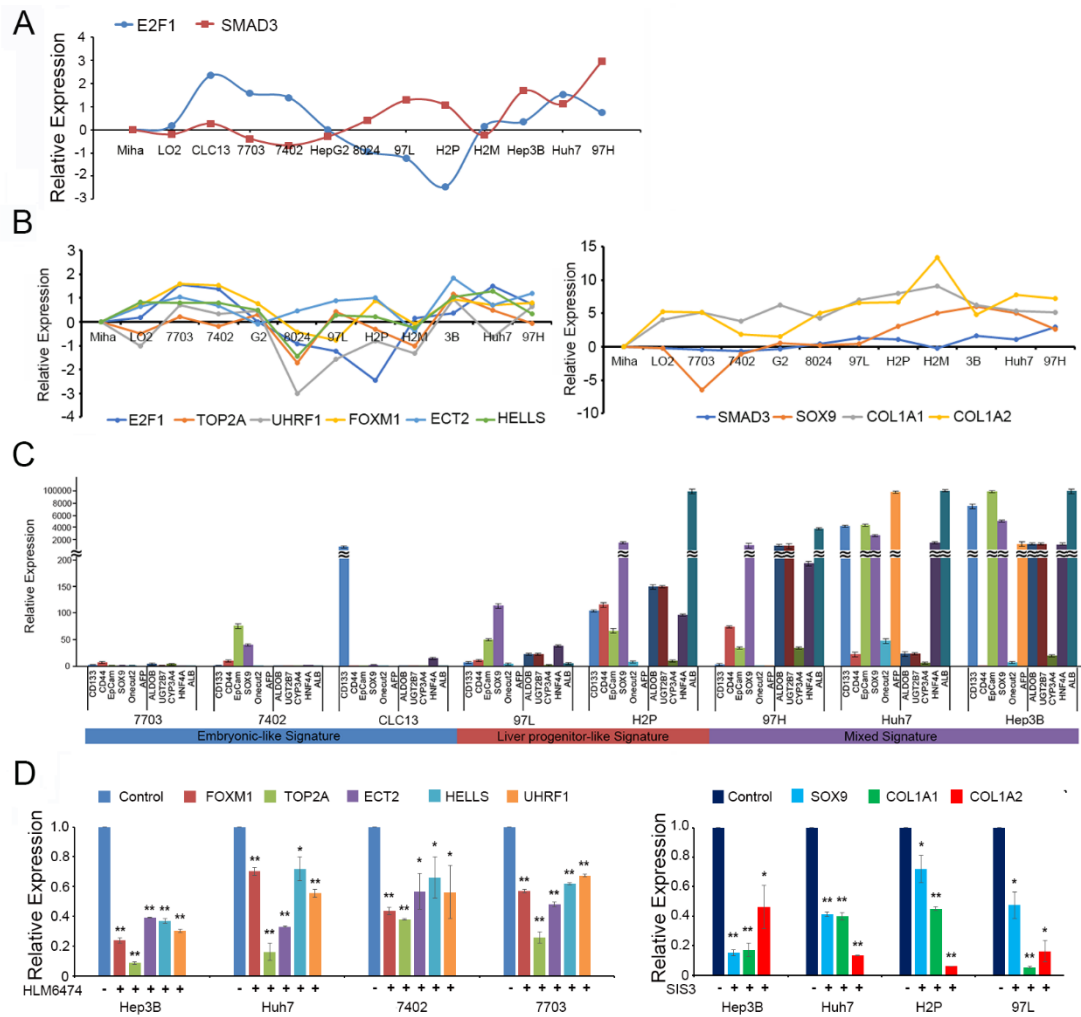

Liu et al. Appendix Fig. S2

**Fig. S2. Relative expression of signature biomarkers and their responses to specific inhibitors.**

(A) The expression of E2F1 and SMAD3 were detected by quantitative real time PCR (qPCR) in series of HCC cell lines as well as immortalized liver cell lines. (B) The relative expression of core module genes was detected by qPCR in series of HCC cell lines. (C) The relative expression of liver progenitor cell markers (CD133, CD44, EpCam, Sox9, Onecut2, AFP) and hepatocyte differentiation markers (ALDOB, UGT2B7, CYP3A4, HNF4A, ALB) were detected by quantitative real-time PCR in HCC cell lines with ES-like signature (7703, 7402), LP-like signature (97L, H2P) and Mixed signature (97H, Huh7, Hep3B). (D) HCC cell lines were treated with E2F1 specific inhibitor HLM6474 (50 $\mu$ M) and SMAD3 specific inhibitor SIS3 (20 $\mu$ M) respectively. The relative expression of the core module genes was detected by qPCR. \*, P<0.05, \*\*, P<0.01 by independent t test.

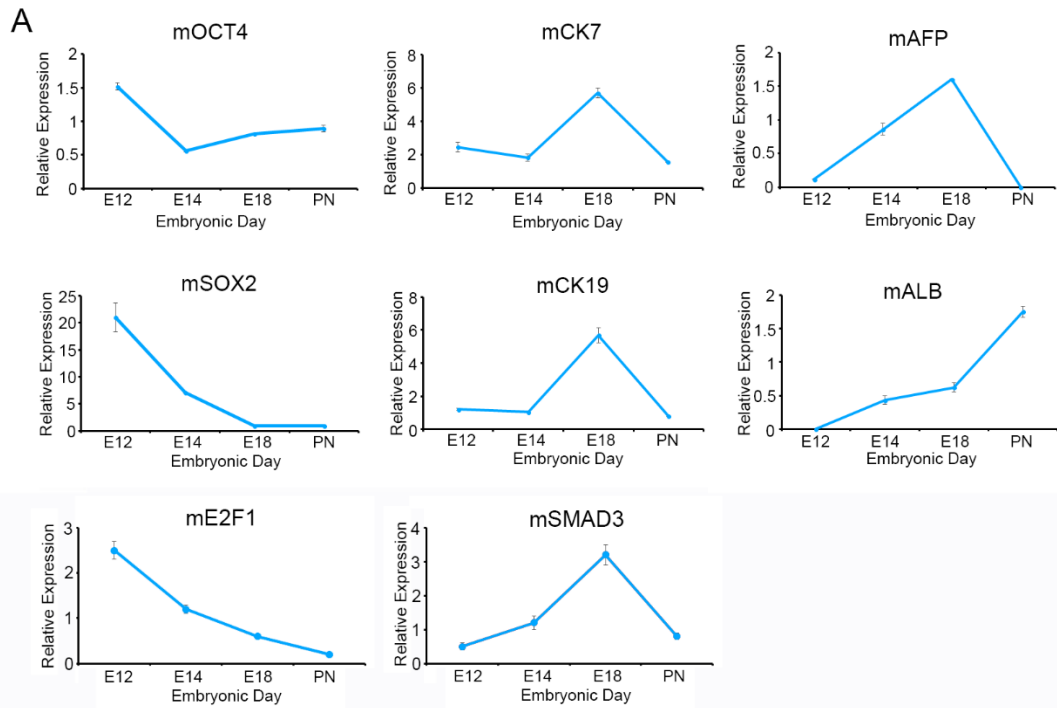

Liu et al. Appendix Fig. S3

**Fig. S3. Relative expression of signature biomarkers during mice fetal liver development.**

(A) Mice fetal liver at different developmental stages (E12, E14, E18, Perinatal) were collected, and the total RNA were extracted. The relative expressions of representative biomarkers including mOCT4, mSOX2, mCK7, mCK19, mAFP, mALB, mE2F1, and mSMAD3 were detected by qPCR.

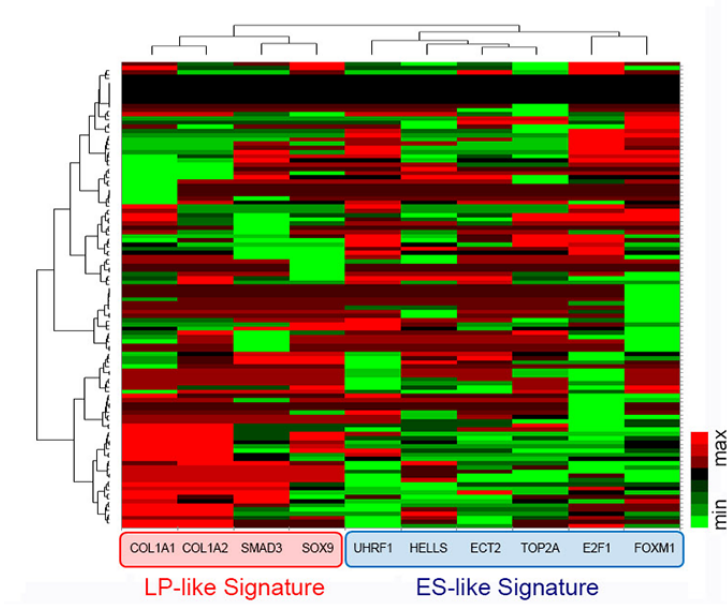

Liu et al. Appendix, Fig. S4

**Fig. S4 Hierarchical clustering analysis was used to detect the selected core module genes in an independent cohort of clinical HCC patients.**

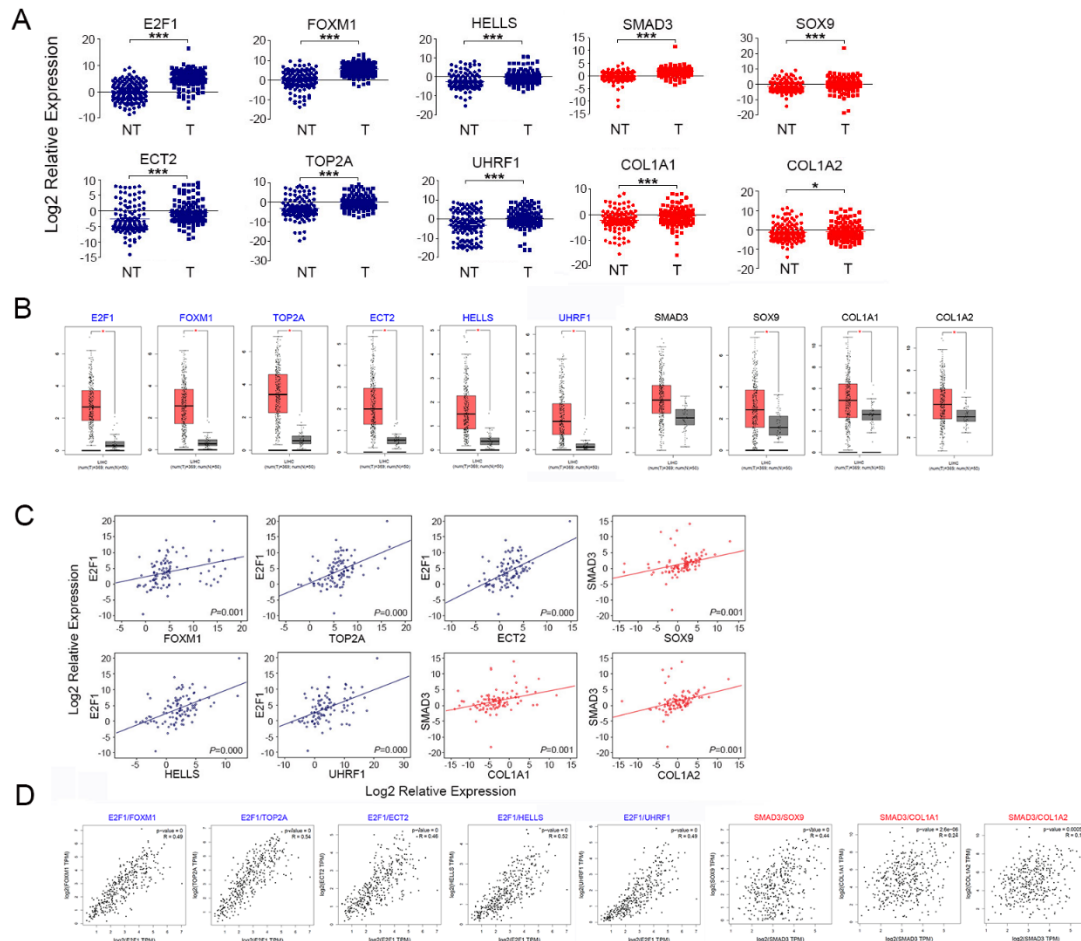

Liu et al. Appendix Fig. S5

**Fig. S5 Relative expression of core module oncofetal genes and their correlations in paired HCC clinical samples.**

(A) The relative expression of ES-like signature genes and LP-like signature genes were examined by qPCR in HCC patients from HKU\_HCC cohort (N=99). Paired sample t test, \*\*\*,  $P < 0.001$ . (B) The relative expression of ES-like signature genes and LP-like signature genes were examined in the TCGA\_HCC cohort using GEPIA web server (N=369). Independent t test, \*,  $P < 0.05$ . (C) The correlation of ES-like oncofetal driver E2F1 with core module genes (FOXM1, TOP2A, ECT2, HELLS, UHRF1) and the correlation of LP-like oncofetal driver SMAD3 with core module genes (SOX9, COL1A1, COL1A2) were examined by qPCR in HCC patients from HKU\_HCC cohort (N=99). Pearson's  $\chi^2$  test. (D) The correlation of ES-like oncofetal driver E2F1 with core module genes (FOXM1, TOP2A, ECT2, HELLS, UHRF1) and the correlation of LP-like oncofetal driver SMAD3 with core module genes (SOX9, COL1A1, COL1A2) were examined in the TCGA\_HCC cohort using GEPIA web server (N=369). Pearson's  $\chi^2$  test.

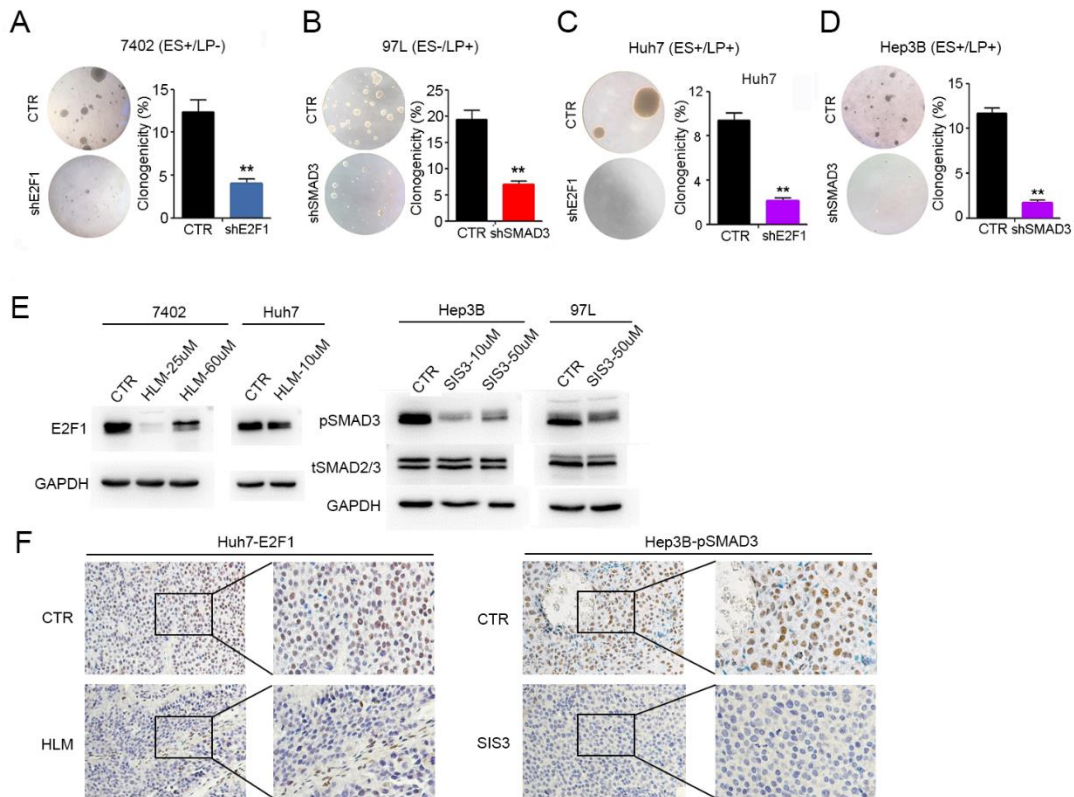

Liu et al. Appendix Fig. S6

**Fig. S6 Expression of oncofetal drivers and functional roles in HCC.**

(A-D) Cells were seeded in 0.4% bactoagar on the bottom layer of solidified 0.6% bactoagar in six-well plates at a density of 3,000 cells/well. The clonogenicity was counted 3 weeks later. (E) The expression of E2F1 was examined by western blot in HCC cell lines treated with control or HLM. The expression of pSMAD3 and total SMAD3 was examined by western blot in HCC cell lines treated with control or SIS3. (F) The staining of E2F1 was examined by IHC in xenograft tumors treated with control or HLM in Huh7 cells. The staining of pSMAD3 was examined by IHC in xenograft tumors treated with control or SIS3 in Hep3B cells.



**Table S1. Activation scores of the upstream regulators and the predicted downstream targets in two subtypes of liver cancer**

| Upstream Regulator | Fold Change in Tumor | Activation Z score | P-value of overlap |
|--------------------|----------------------|--------------------|--------------------|
| <b>ES-like</b>     |                      |                    |                    |
| E2F1               | 15.387               | 5.977              | 3.40E-22           |
| FOXM1              | 8.134                | 3.750              | 8.38E-03           |
| E2F3               | 4.403                | 2.157              | 3.54E-02           |
| MYCN               | 2.648                | 5.082              | 1.80E-07           |
| <b>LP-like</b>     |                      |                    |                    |
| SMAD3              | 2.675                | 3.948              | 3.87E-02           |
| Gene Name          | Fold Change in Tumor | Prediction         |                    |
| TOP2A              | 18.106               | Activated          |                    |
| E2F1               | 15.387               | Activated          |                    |
| E2F3               | 14.025               | Activated          |                    |
| UHRF1              | 13.165               | Activated          |                    |
| CDC6               | 12.232               | Activated          |                    |
| HELLS              | 9.538                | Activated          |                    |
| ECT2               | 8.865                | Activated          |                    |
| CDC45              | 8.414                | Activated          |                    |
| FOXM1              | 8.134                | Activated          |                    |
| Gene Name          | Fold Change in Tumor | Prediction         |                    |
| COL2A1             | 314.265              | Activated          |                    |
| SOX9               | 6.886                | Activated          |                    |
| HEY1               | 4.047                | Activated          |                    |
| VEGFA              | 3.391                | Activated          |                    |
| COL1A1             | 2.815                | Activated          |                    |
| SMAD3              | 2.675                | Activated          |                    |
| INHA               | 2.409                | Activated          |                    |

**Table S2. Clinical pathological correlation of liver cancer subtypes in HKU-HCC Patients.**

| Clinical pathological features  | Total | Liver cancer subtypes |         |         |         | P*           |
|---------------------------------|-------|-----------------------|---------|---------|---------|--------------|
|                                 |       | ES-/LP-               | ES+/LP- | ES-/LP+ | ES+/LP+ |              |
| <b>Gender</b>                   |       |                       |         |         |         |              |
| Male                            | 84    | 31                    | 18      | 16      | 20      | 0.451        |
| Female                          | 15    | 3                     | 3       | 2       | 6       |              |
| <b>Age</b>                      |       |                       |         |         |         |              |
| < 60                            | 84    | 26                    | 19      | 14      | 25      | 0.129        |
| ≥ 60                            | 15    | 8                     | 2       | 4       | 1       |              |
| <b>Preoperative AFP</b>         |       |                       |         |         |         |              |
| < 300 ng/ml                     | 54    | 20                    | 11      | 11      | 12      | 0.162        |
| ≥300 ng/ml                      | 45    | 14                    | 10      | 7       | 14      |              |
| <b>Recurrence or Metastasis</b> |       |                       |         |         |         |              |
| No                              | 52    | 22                    | 10      | 7       | 13      | 0.386        |
| Yes                             | 44    | 12                    | 11      | 10      | 11      |              |
| <b>HBsAg</b>                    |       |                       |         |         |         |              |
| Negative                        | 20    | 7                     | 2       | 4       | 7       | 0.585        |
| Positive                        | 71    | 23                    | 17      | 12      | 19      |              |
| <b>HCVAb</b>                    |       |                       |         |         |         |              |
| Negative                        | 89    | 29                    | 19      | 15      | 26      | 0.491        |
| Positive                        | 2     | 1                     | 0       | 1       | 0       |              |
| <b>Cirrhosis</b>                |       |                       |         |         |         |              |
| No                              | 30    | 13                    | 8       | 5       | 4       | 0.124        |
| Mild                            | 34    | 7                     | 8       | 9       | 10      |              |
| Moderate                        | 20    | 5                     | 4       | 2       | 9       |              |
| Severe                          | 8     | 5                     | 0       | 1       | 2       |              |
| <b>Tumor Size</b>               |       |                       |         |         |         |              |
| < 5 cm                          | 27    | 7                     | 3       | 4       | 13      | <b>0.042</b> |
| ≥5 cm                           | 66    | 23                    | 17      | 13      | 13      |              |
| <b>Tumor Number</b>             |       |                       |         |         |         |              |
| 1                               | 72    | 23                    | 14      | 15      | 20      | 0.743        |
| 2                               | 11    | 4                     | 2       | 1       | 4       |              |
| 3                               | 10    | 3                     | 4       | 1       | 2       |              |
| <b>Vascular Invasion</b>        |       |                       |         |         |         |              |
| No                              | 87    | 30                    | 19      | 17      | 21      | <b>0.016</b> |
| Yes                             | 6     | 0                     | 1       | 0       | 5       |              |
| <b>Capsule</b>                  |       |                       |         |         |         |              |
| Complete                        | 41    | 16                    | 6       | 7       | 12      | 0.554        |
| Incomplete                      | 33    | 7                     | 9       | 8       | 9       |              |
| No                              | 19    | 7                     | 5       | 2       | 5       |              |
| <b>TNM Stage</b>                |       |                       |         |         |         |              |
| I                               | 50    | 14                    | 11      | 12      | 13      | 0.274        |
| II                              | 2     | 0                     | 0       | 0       | 2       |              |
| IIIA                            | 12    | 5                     | 4       | 1       | 2       |              |
| IIIB                            | 2     | 0                     | 1       | 1       | 0       |              |
| IIIC                            | 1     | 0                     | 0       | 1       | 0       |              |
| IV                              | 0     | 0                     | 0       | 0       | 0       |              |

| <b>Differentiation</b> |    |    |    |   |    |              |
|------------------------|----|----|----|---|----|--------------|
| Well                   | 16 | 5  | 2  | 7 | 2  |              |
| Moderate               | 70 | 25 | 14 | 8 | 23 | <b>0.005</b> |
| Poor                   | 4  | 0  | 3  | 0 | 1  |              |

\*: Two-sided  $\chi^2$  test;

**Table S3. Distribution of liver cancer subtypes in previously reported classification.**

| Subtypes                       | ES+/LP-    | ES+/LP+    | ES-/LP+    | ES-/LP-     | Num | P value*     |
|--------------------------------|------------|------------|------------|-------------|-----|--------------|
| <b>Cluster A/B<sup>1</sup></b> |            |            |            |             |     |              |
| Cluster A                      | 63 (17.0%) | 81 (21.8%) | 21 (5.7%)  | 11 (3.0%)   | 176 | <b>0.000</b> |
| Cluster B                      | 26 (7.0%)  | 12 (3.2%)  | 49 (13.2%) | 108 (29.1%) | 195 |              |
| <b>HB/HC<sup>2</sup></b>       |            |            |            |             |     |              |
| HB                             | 19 (5.1%)  | 55 (14.8%) | 49 (13.2%) | 20 (5.4%)   | 143 | <b>0.000</b> |
| HC                             | 70 (18.9%) | 38 (10.2%) | 21 (5.7%)  | 99 (26.7%)  | 228 |              |
| <b>EpCam<sup>3</sup></b>       |            |            |            |             |     |              |
| EpCam-                         | 65 (17.5%) | 40 (10.8%) | 52 (14.0%) | 104 (28.0%) | 261 | <b>0.000</b> |
| EpCam+                         | 24 (6.5%)  | 53 (14.3%) | 18 (4.9%)  | 15 (4.0%)   | 110 |              |
| <b>S1-S3<sup>4</sup></b>       |            |            |            |             |     |              |
| S1                             | 15 (4.0%)  | 58 (15.6%) | 33 (8.9%)  | 6 (1.6%)    | 112 | <b>0.000</b> |
| S2                             | 38 (10.2%) | 31 (8.4%)  | 12 (3.2%)  | 21 (5.7%)   | 102 |              |
| S3                             | 36 (9.7%)  | 4 (1.1%)   | 25 (6.7%)  | 92 (24.8%)  | 157 |              |
| <b>G1-G6<sup>5</sup></b>       |            |            |            |             |     |              |
| G1                             | 5 (1.3%)   | 26 (7.0%)  | 10 (2.7%)  | 6 (1.6%)    | 47  | <b>0.000</b> |
| G2                             | 13 (3.5%)  | 13 (3.5%)  | 6 (1.6%)   | 13 (3.5%)   | 45  |              |
| G3                             | 36 (9.7%)  | 40 (10.8%) | 2 (0.5%)   | 8 (2.2%)    | 86  |              |
| G4                             | 26 (7.0%)  | 8 (2.2%)   | 19 (5.1%)  | 45 (12.1%)  | 98  |              |
| G5-6                           | 9 (2.4%)   | 6 (1.6%)   | 33 (8.9%)  | 47 (12.7%)  | 95  |              |

\*, Two-sided  $\chi^2$  test;

<sup>1</sup>, The top rated 11 survival genes with hazard ratio greater than 2.5 (TOPBP1, GTPBP4, PTMA, YWHAB, SUMO2, PDCD5, NLRP2, SLBP, BUB3, DLGAP5, HDAC2) were selected to classify Cluster A and Cluster B subgroups of HCC patients, according to Lee et al. Hepatology 2004. Each gene with relative expression greater than median value was given 1 score. Patients with average score of the 11 signature genes greater than 0.5 was classified as Cluster A subtype, and less than 0.5 was classified as Cluster B subtype.

<sup>2</sup>, The top 6 representative hepatoblast signature genes (KRT7, KRT19, VIM, FOS, FOSL2, JUNB) were selected to classify HB and HC subgroups of HCC patients, according to Lee et al. Nat Med 2006. Each gene with relative expression greater than median value was given 1 score. Patients with average score of the 6 signature genes greater than 0.5 was classified as HB subtype, and less than 0.5 was classified as HC subtype.

<sup>3</sup>, The relative expression of EpCam and AFP was selected to classify EpCam+ and EpCam- subgroups of HCC patients, according to Yamashita et al. Gastroenterology 2009. Gene with relative expression greater than median value was considered positive. Only EpCam and AFP double positive patients were classified as EpCam+ subtype, and the rest were classified as EpCam- subtype.

<sup>4</sup>, The top rated 10 genes representing S1-S3 subgroups of HCC patients (S1: IQGAP1, S100A11, RAB31, CD37, POSTN, ARHGDI, ALOX5AP, LAPTM5, CSPG2, ARPC2; S2: COL2A1, GPC3, AFP, AHCY, TARBP1, ARID3A, FGFR3, SMARCC1, RPS5, EIF4A2; S3: GLYAT, SERPINC1, APOC4, MTHFD1, GPT, HPD, SERPING1, DPAGT1, PCK1, HGD) were selected according to Hoshida et al. Cancer Res 2009. Each gene with relative expression greater than median value was given 1 score. Patient were assigned to different subgroups according to their relative scores.

<sup>5</sup>, The top rated 10 genes representing G1-G6 subgroups of HCC patients (G1:IGF2, PEG3, SOX9, SPINT2, AFP, MYH4, MGC11242, SPINT1, ZNF83, ST14; G2:NAV3, ENPP2, AF1Q,

EPHA1, MEIS2, DEGS, RRAS2, CD58, INHBB, MOSPD1; G3: G6PD, HN1, PFN2, NDRG1, PHB, MAD2L1, NRAS, ENO1, NME1, HCAP-G; G5-6:PAP, SPARCL1, GLUL, LAMA3, TBX3, REG1A, C1QTNF3, CTNNA2, LEF1, RHOBTB1) were selected according to Boyault et al. Hepatology 2007. Each gene with relative expression greater than median value was given 1 score. Patient were assigned to different subgroups according to their relative scores.

**Table S4. Sequences of primers used in qPCR.**

| <b>Primer</b> | <b>Sequence (5'-3')</b> |
|---------------|-------------------------|
| qRT-E2F3-F    | AAAGCCCCTCCAGAAACAAGA   |
| qRT-E2F3-R    | CCTTGGGTACTTGCCAAATGT   |
| qRT-CCT2-F    | GAACGCCTAGCTCTTGTCACA   |
| qRT-CCT2-R    | GCACCACGCAAAACAATGGTA   |
| qRT-18S-F     | AACCCGTTGAACCCCAT       |
| qRT-18S-R     | CCATCCAATCGGTAGTAGCG    |
| qRT-HELLS-F   | AGAAGGCATGGAATGGCTTAGG  |
| qRT-HELLS-R   | GCCACAGACAAGAAAAGGTCC   |
| qRT-ECT2-F    | ATACCCCTAACAGCAATCGCA   |
| qRT-ECT2-R    | GAAATGGTGACACGTCTGTCT   |
| qRT-TOP2A-F   | TGGCTGTGGTATTGTAGAAAGC  |
| qRT-TOP2A-R   | TTGGCATCATCGAGTTTGGGA   |
| qRT-CDC6-F    | ACCTATGCAACACTCCCCATT   |
| qRT-CDC6-R    | TGGCTAGTTCTCTTTTGCTAGGA |
| qRT-KIF23-F   | TACCCATTTGAATCGTGAGTCCA |
| qRT-KIF23-R   | CTCTGGTCCGGTTAGTTCTTTC  |
| qRT-FOXM1-F   | ATACGTGGATTGAGGACCACT   |
| qRT-FOXM1-R   | TCCAATGTCAAGTAGCGGTTG   |
| qRT-UHRF1-F   | AGGTGGTCATGCTCAACTACA   |
| qRT-UHRF1-R   | CACGTTGGCGTAGAGTTCCC    |
| qRT-HEY1-F    | GAAGTTGCGCGTTATCTGAGC   |
| qRT-HEY1-R    | ATGCGAAACCAGTCGAACTCG   |
| qRT-SOX9-F    | AGCGAACGCACATCAAGAC     |
| qRT-SOX9-R    | CTGTAGGCGATCTGTTGGGG    |
| qRT-VEGFA-F   | AGGGCAGAATCATCACGAAGT   |
| qRT-VEGFA-R   | AGGGTCTCGATTGGATGGCA    |
| qRT-COL1A1-F  | ATCAACCGGAGGAATTTCCGT   |
| qRT-COL1A1-R  | CACCAGGACGACCAGGTTTTC   |
| qRT-COL1A2-F  | GGCCCTCAAGGTTTCCAAGG    |
| qRT-COL1A2-R  | CACCCTGTGGTCCAACAACCTC  |
| qRT-COL2A1-F  | CCAGATGACCTTCCTACGCC    |
| qRT-COL2A1-R  | TTCAGGGCAGTGTACGTGAAC   |

|              |                         |
|--------------|-------------------------|
| qRT-INHA-F   | TTCCACTACTGTCATGGTGGT   |
| qRT-INHA-R   | AGTGCTGCGTGAGAAGGTTG    |
| qRT-E2F1-F   | CATCCCAGGAGGTCACCTTCTG  |
| qRT-E2F1-R   | GACAACAGCGGTTCTTGCTC    |
| qRT-SMAD3-F  | GCGTGCGGCTCTACTACATC    |
| qRT-SMAD3-R  | GCACATTCGGGTCAACTGGTA   |
| qRT-MCM10-F  | AAGCCTTCTCTGGTCTGCG     |
| qRT-MCM10-R  | CTGTGGCGTAACCTTCTTCAA   |
| qRT-CCNA2-F  | GGATGGTAGTTTTGAGTCACCAC |
| qRT-CCNA2-R  | CACGAGGATAGCTCTCATACTGT |
| qRT-CDC25A-F | TTCCTCTTTTTACACCCCAGTCA |
| qRT-CDC25A-R | TCGGTTGTCAAGGTTTGTAGTTC |
| qRT-ORC1-F   | ACCGAGATTCACATCCAGATTGG |
| qRT-ORC1-R   | CGAGCACGTTTCTTAGGAGGA   |
| qRT-CCNB1-F  | AACTTTCGCCTGAGCCTATTTT  |
| qRT-CCNB1-R  | TTGGTCTGACTGCTTGCTCTT   |
| qRT-POLD1-F  | CAGTGCCAAGGTGGTGTATGG   |
| qRT-POLD1-R  | CTTGCTGATAAGCAGGTATGGG  |
| qRT-MCM8-F   | TTTACAGCGATAGCTCTCCTTTG |
| qRT-MCM8-R   | AGGTGCATCTCTTAGTTCAGTTG |
| qRT-CDC45-F  | GTGGGCCATCGTTGGACTAAC   |
| qRT-CDC45-R  | TCAAAGGAGATCCGTGTGCAG   |
| qRT-cMYC-F   | GGCTCCTGGCAAAGGTCA      |
| qRT-cMYC-R   | CTGCGTAGTTGTGCTGATGT    |
| qRT-OCT4-F   | CAAAGCAGAAACCCTCGTGC    |
| qRT-OCT4-R   | TCTCACTCGGTTCTCGATACTG  |
| qRT-SOX2-F   | TGGACAGTTACGCGCACAT     |
| qRT-SOX2-R   | CGAGTAGGACATGCTGTAGGT   |
| qRT-NANOG-F  | TTTGTGGGCCTGAAGAAAAC    |
| qRT-NANOG-R  | AGGGCTGTCCTGAATAAGCAG   |
| qRT-GLI1-F   | AACGCTATACAGATCCTAGCTCG |
| qRT-GLI1-R   | GTGCCGTTTGGTCACATGG     |
| qRT-GLI2-F   | CATGGAGCACTACCTCCGTTC   |
| qRT-GLI2-R   | CGAGGGTCATCTGGTGGTAAT   |

|              |                         |
|--------------|-------------------------|
| qRT-GLI3-F   | ACTTCCGCCTTATCTAGTAGCC  |
| qRT-GLI3-R   | CCACGGGTTGCTGAGATCAT    |
| qRT-ZIC2-F   | CACCTCCGATAAGCCCTATCT   |
| qRT-ZIC2-R   | GGCGTGGACGACTCATAGC     |
| qRT-NOTCH1-F | GAGGCGTGGCAGACTATGC     |
| qRT-NOTCH1-R | CTTGTACTCCGTCAGCGTGA    |
| qRT-NOTCH2-F | CAACCGCAATGGAGGCTATG    |
| qRT-NOTCH2-R | GCGAAGGCACAATCATCAATGTT |
| qRT-NOTCH3-F | CGTGGCTACACTGGACCTC     |
| qRT-NOTCH3-R | AGATACAGGTGAACTGGCCTAT  |
| qRT-RBPJ-F   | CTGACTCAGACAAGCGAAAGC   |
| qRT-RBPJ-R   | AGGAACACACCAATGTCATCAC  |
| qRT-HEY1-F   | GCCCGCCCTTGTCAGTATC     |
| qRT-HEY1-R   | ATGCGAAACCAGTCGAACTCG   |
| qRT-HEY2-F   | GCCCGCCCTTGTCAGTATC     |
| qRT-HEY2-R   | CCAGGGTCGGTAAGGTTTATTG  |
| qRT-HEYL-F   | GGCTGCTTACGTGGCTGTT     |
| qRT-HEYL-R   | GACCCAGGAGTGGTAGAGCAT   |
| qRT-TGFB1-F  | CAATTCCTGGCGATACCTCAG   |
| qRT-TGFB1-R  | GCACAACCTCCGGTGACATCAA  |
| qRT-TGFB2-F  | CCATCCCGCCCACTTTCTAC    |
| qRT-TGFB2-R  | AGCTCAATCCGTTGTTTCAGGC  |
| qRT-GDF6-F   | CCTATCACTGCGAGGGTGTAT   |
| qRT-GDF6-R   | GATGGGAGTCAATTTGGTGGG   |
| qRT-BMP4-F   | TAGCAAGAGTGCCGTCATTCC   |
| qRT-BMP4-R   | GCGCTCAGGATACTCAAGACC   |
| qRT-SMAD6-F  | GCTACCAACTCCCTCATCACT   |
| qRT-SMAD6-R  | CGTACACCGCATAGAGGCG     |
| qRT-TGFBR1-F | CACAGAGTGGGAACAAAAAGGT  |
| qRT-TGFBR1-R | CCAATGGAACATCGTCGAGCA   |
| qRT-AXIN2-F  | AGCCAAAGCGATCTACAAAAGG  |
| qRT-AXIN2-R  | AAGTCAAAAACATCTGGTAGGCA |
| qRT-LEF1-F   | AGAACACCCCGATGACGGA     |
| qRT-LEF1-R   | GGCATCATTATGTACCCGGAAT  |



|              |                         |
|--------------|-------------------------|
| qRT-TCF7L1-F | TCGTCCCTGGTCAACGAGT     |
| qRT-TCF7L1-R | ACTTCGGCGAAATAGTCCCG    |
| qRT-TCF7L2-F | AGAAACGAATCAAAACAGCTCCT |
| qRT-TCF7L2-R | CGGGATTTGTCTCGGAACTT    |
| qRT-PPARD-F  | GCCTCTATCGTCAACAAGGAC   |
| qRT-PPARD-R  | GCAATGAATAGGGCCAGGTC    |
| qRT-FOSL1-F  | CAGGCGGAGACTGACAACTG    |
| qRT-FOSL1-R  | TCCTTCCGGGATTTTGCAGAT   |
| qRT-FZD3-F   | AATATGGACGTGTCACACTTCC  |
| qRT-FZD3-R   | GGATATGGCTCATCACAATCTGG |
| qRT-FZD6-F   | GCGATAGCACAGCCTGCAATA   |
| qRT-FZD6-R   | AATGGTAAGAATCACCCACCAC  |
| qRT-COL4A4-F | AGGCTCAACTGGTCTAAGAGG   |
| qRT-COL4A4-R | GCAGGGTCACCTTTGTTTCC    |
| qRT-COL8A1-F | AAAGGGGAAATTGGGCCTATG   |
| qRT-COL8A1-R | CTGGTTGCCCTGGTAACCC     |
| qRT-ITGB1-F  | CAAGAGAGCTGAAGACTATCCCA |
| qRT-ITGB1-R  | TGAAGTCCGAAGTAATCCTCCT  |
| qRT-ITGB6-F  | CTCAACACAATAAAGGAGCTGGG |
| qRT-ITGB6-R  | AAAGGGGATACAGGTTTTTCCAC |
| qRT-LAMA3-F  | TGCTAACAGTATCCGGGATTCT  |
| qRT-LAMA3-R  | TCTTGGTTCAAGCCATTTGCC   |
| qRT-LAMB3-F  | CCAAAGGTGCGACTGCAATG    |
| qRT-LAMB3-R  | AGTTCTTGCCTTCGGTGTGG    |
| qRT-AFP-F    | CTTTGGGCTGCTCGCTATGA    |
| qRT-AFP-R    | GCATGTTGATTTAACAAGCTGCT |
| qRT-CK7-F    | TCCGCGAGGTCACCATTAAC    |
| qRT-CK7-R    | GCTCTGTCAACTCCGTCTCAT   |
| qRT-CK19-F   | AACGGCGAGCTAGAGGTGA     |
| qRT-CK19-R   | GGATGGTCGTGTAGTAGTGGC   |
| qRT-EPCAM-F  | AATCGTCAATGCCAGTGTACTT  |
| qRT-EPCAM-R  | TTCATCGCAGTCAGGATCATAA  |
| qRT-mOCT4-F  | GGCTTCAGACTTCGCCTCC     |
| qRT-mOCT4-R  | AACCTGAGGTCCACAGTATGC   |
| qRT-mSOX2-F  | GCGGAGTGGAACTTTTGTCC    |

|              |                         |
|--------------|-------------------------|
| qRT-mSOX2-R  | CGGGAAGCGTGTACTTATCCTT  |
| qRT-mKRT7-F  | AGGAGATCAACCGACGCAC     |
| qRT-mKRT7-R  | GTCTCGTGAAGGGTCTTGAGG   |
| qRT-mKRT19-F | GGGGGTTTCAGTACGCATTGG   |
| qRT-mKRT19-R | GAGGACGAGGTCACGAAGC     |
| qRT-mAFP-F   | CTCCCTCATCCTCCTGCTAC    |
| qRT-mAFP-R   | ACAAACTGGGTAAAGGTGATGG  |
| qRT-mALB-F   | TGCTTTTTCCAGGGGTGTGTT   |
| qRT-mALB-R   | TTACTTCCTGCACTAATTTGGCA |
| qRT-mE2F1-F  | CTCGACTCCTCGCAGATCG     |
| qRT-mE2F1-R  | GATCCAGCCTCCGTTTCACC    |
| qRT-mSMAD3-F | CACGCAGAACGTGAACACC     |
| qRT-mSMAD3-R | GGCAGTAGATAACGTGAGGGA   |
| qRT-m18S-F   | AGGGGAGAGCGGGTAAGAGA    |
| qRT-m18S-R   | GGACAGGACTAGGCGGAACA    |
